# Supplementary material for: Anti‐atherosclerotic effect of the angiotensin 1–7 mimetic AVE0991 is mediated by inhibition of perivascular and plaque inflammation in early atherosclerosis
Source: PubMed Central journal article supplement (PMC5659999; doi:10.1111/bph.13685), 2017-02-01
Supplement: BPH-174-4055-s001.pdf [file BPH-174-4055-s001.pdf]

## Supplementary materials

**Table S1. List of TaqMan® probes.**

| Gene          | Catalogue number | Gene         | Catalogue number |
|---------------|------------------|--------------|------------------|
| <b>Mouse</b>  |                  | <b>Human</b> |                  |
| <i>Agtr1a</i> | Mm00616371_m1    | <i>AGTR1</i> | Hs00258938_m1    |
| <i>Agtr2</i>  | Mm01341373_m1    | <i>AGTR2</i> | Hs02621316_s1    |
| <i>Mas1</i>   | Mm01313002_m     | <i>MAS1</i>  | Hs00267157_s1    |
| <i>Ccl5</i>   | Mm01302427_m1    |              |                  |
| <i>Ccl2</i>   | Mm00441242_m1    |              |                  |
| <i>Rn18s</i>  | Mm03928990_g1    |              |                  |
| <i>Icam1</i>  | Mm00516023_m1    |              |                  |
| <i>Cxcl10</i> | Mm00445235_m1    |              |                  |
| <i>Cxcr3</i>  | Mm99999054_s1    |              |                  |
| <i>IL6</i>    | Mm00446190_m1    |              |                  |
| <i>Tnf-α</i>  | Mm00443258_m1    |              |                  |

**Table S2. List of human primers used for SybrGreen qPCR.**

| Gene          | Forward primer sequence (5'→3') | Reverse primer sequence (5'→3') |
|---------------|---------------------------------|---------------------------------|
| <i>CCR7</i>   | TGGTGGTGGCTCTCCTTGTC            | TGTGGTGTTGTCTCCGATGTAATC        |
| <i>MRC1</i>   | ACCTCACAAGTATCCACACCATC         | CTTTCATCACCACACAATCCTC          |
| <i>CD209</i>  | TCAAGCAGTATTGGAACAGAGGA         | CAGGAGGCTGCGGACTTTTT            |
| <i>CXCL10</i> | ATTTGCTGCCTTATCTTTCTG           | TCTCACCTTCTTTTTTCATTGTAG        |
| <i>IL1B</i>   | TCCAGGGACAGGATATGGAG            | TCTTTC AACACGCAGGACAG           |
| <i>TNF</i>    | AGCCCATGTTGTAGCAAACC            | TGAGGTACAGGCCCTCTGAT            |
| <i>MCP1</i>   | CCCCAGTCACCTGCTGTTAT            | AGATCTCCTTGCCACAATG             |

**Table S3. Flow cytometry antibodies used**

| Antibody           | Clone           | Company       |
|--------------------|-----------------|---------------|
| anti-CD45 PerCP    | Clone 30-F11    | BD Bioscience |
| anti-CD45 V450     | Clone 30-F11    | BD Bioscience |
| anti-CD3e APC      | Clone 145-2C11  | BD Bioscience |
| anti-CD8a PerCP    | Clone 53-6.7    | BD Bioscience |
| anti-CD4 APC-H7    | Clone GK1.5     | BD Bioscience |
| anti-CD19 APC-H7   | Clone 1D3       | BD Bioscience |
| anti-I-A[b] FITC   | Clone AF6-120.1 | BD Bioscience |
| anti-CD11b PE      | Clone M1/70     | BD Bioscience |
| anti-CD11c APC     | Clone HL3       | BD Bioscience |
| anti-Gr1 APC       | Clone RB6-8C5   | BD Bioscience |
| anti-NK-1.1 APC    | Clone PK136     | BD Bioscience |
| anti-CD11b APC-Cy7 | Clone M1/70     | BD Bioscience |
| anti-CD11c PE      | Clone HL3       | BD Bioscience |
| anti-CD206 FITC    | Clone C068C2    | BioLegend     |
| anti-F4/80 APC     | Clone BM8       | eBioscience   |
| anti-Ly6C PE       | Clone AL-21     | BD Bioscience |
| anti-Ly6G PE-Cy7   | Clone 1A8       | BD Bioscience |
| anti-CD43 FITC     | Clone S7        | BD Bioscience |

**Table S4. Mas receptor mRNA expression in pVAT WT and ApoE<sup>-/-</sup> (n=6-10), in aorta and pVAT from ApoE<sup>-/-</sup> (n=6) and upon THP-1 cell activation (n=5)**

| Gene        | Description               | Fold change | p value |
|-------------|---------------------------|-------------|---------|
| <i>Mas1</i> | C57BL/6J                  | 1.00        |         |
|             | ApoE <sup>-/-</sup>       | 1.79        | 0.11    |
| <i>Mas1</i> | ApoE <sup>-/-</sup> aorta | 1.00        |         |
|             | ApoE <sup>-/-</sup> pVAT  | 5.21        | 0.008   |
| <i>Mas1</i> | THP-1                     | 1.00        |         |
|             | THP-1 + TNF-α             | 1.21        | 0.89    |



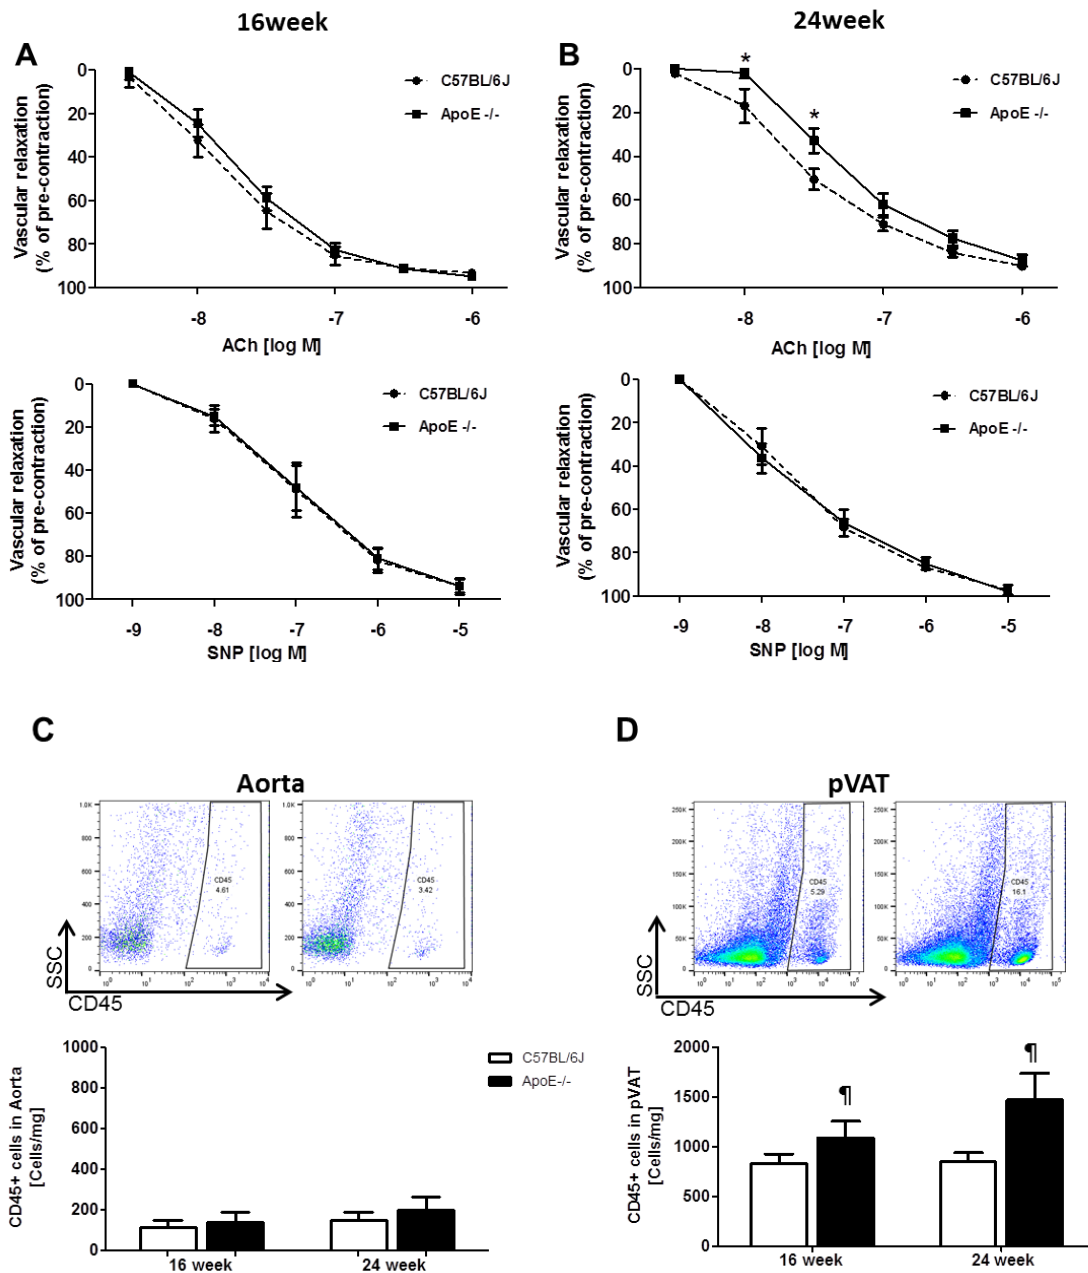

**Figure Suppl. 2. At early stage of atherosclerosis in ApoE<sup>-/-</sup> mice there is no impairment of endothelium-dependent NO bioavailability and visible inflammation in aorta whereas increase of inflammatory cells infiltration is evident in perivascular adipose tissue. (A, B) Vascular relaxation endothelial dependent (ACh) and independent (SNP) were analysed in C57BL/6J and ApoE<sup>-/-</sup> mice at (A) 16 weeks and (B) 24 weeks of age (n=5) (C, D) Representative flow cytometric analysis of leukocytes infiltration to (C) aorta and (D) periaortic adipose tissue in C57BL/6J and ApoE<sup>-/-</sup> mice at 24 weeks of age. Leukocytes infiltration was calculated as a cell number per mg of tissue. \**p*<0.05 by T test.**

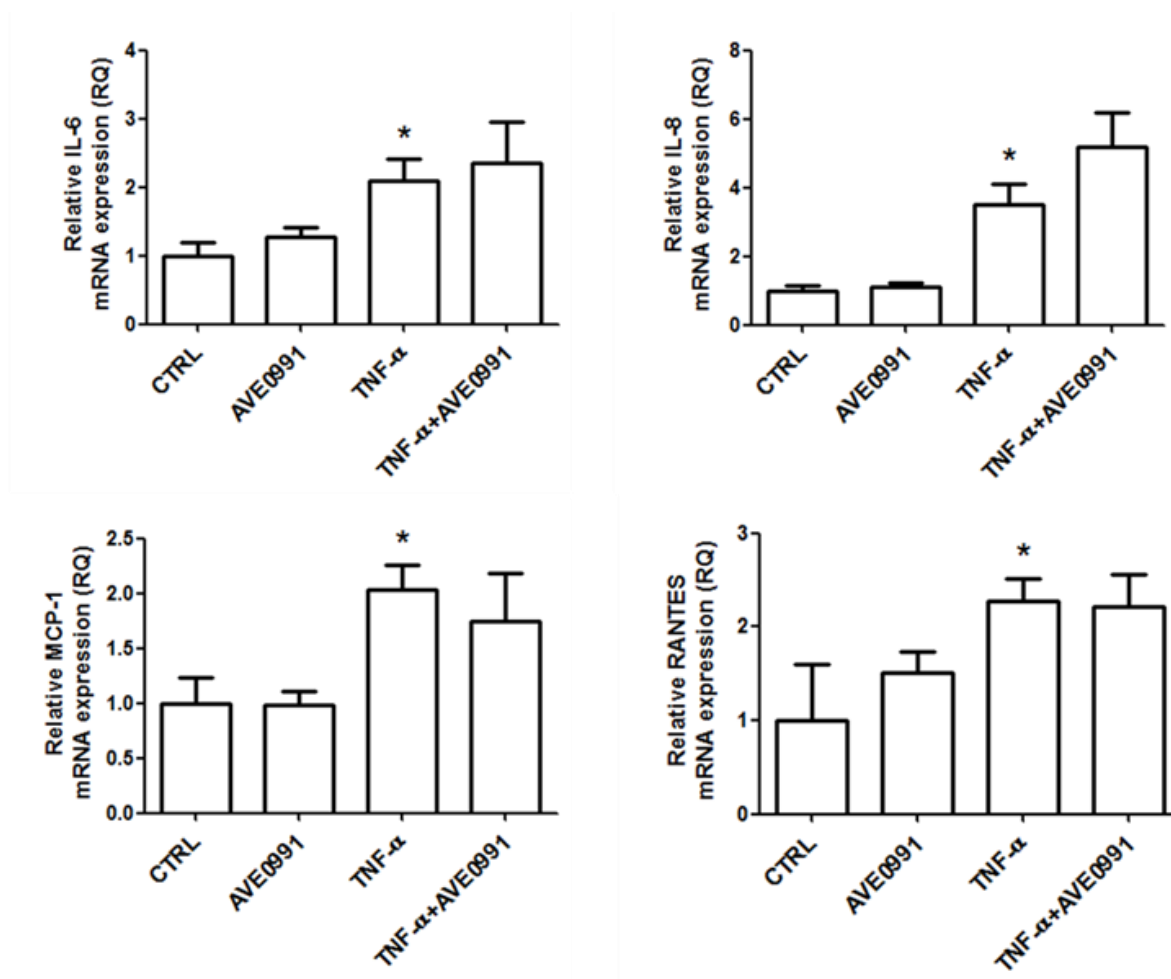

**Figure Suppl. 3. Effect of AVE0991 on TNF- $\alpha$  activated human vascular smooth muscle cells (HVSMC) cytokine and chemokine mRNA expression.** Expression of selected proinflammatory mRNA cytokines and chemokines in HVSM cells stimulated with TNF- $\alpha$  ( $10\text{ ng cm}^{-3}$ ) in presence of AVE0991 ( $1\mu\text{M}$ ) and/or Mas receptor inhibitor A779 ( $5\mu\text{M}$ ) ( $n=5$ ). \* $p<0.05$  vs CTRL (control) by T test.
